# Supplementary material
Source: PubMed Central journal article supplement (PMC6201130)
Supplement: zac011187577s1.pdf [file zac011187577s1.pdf]

**SUPPLEMENTAL MATERIAL**

**Supplemental Table S1.** Demographics and baseline characteristics (intent-to-treat population)<sup>a</sup>

| <b>Characteristic</b>                                      | <b>Cohort 1:<br/>750 mg<br/>MEDI8852 + OS<br/>(n = 31)</b> | <b>Cohort 2:<br/>3,000 mg<br/>MEDI8852 + OS<br/>(n = 31)</b> | <b>Cohort 3:<br/>placebo + OS<br/>(n = 32)</b> | <b>Cohort 4:<br/>3,000 mg<br/>MEDI8852<br/>(n = 32)</b> | <b>Cohorts 1, 2,<br/>and 4 combined:<br/>total MEDI8852<br/>(n = 94)</b> |
|------------------------------------------------------------|------------------------------------------------------------|--------------------------------------------------------------|------------------------------------------------|---------------------------------------------------------|--------------------------------------------------------------------------|
| Hemisphere                                                 |                                                            |                                                              |                                                |                                                         |                                                                          |
| Northern                                                   | 23 (74.2)                                                  | 25 (80.6)                                                    | 24 (75.0)                                      | 23 (71.9)                                               | 71 (75.5)                                                                |
| Southern                                                   | 8 (25.8)                                                   | 6 (19.4)                                                     | 8 (25.0)                                       | 9 (28.1)                                                | 23 (24.5)                                                                |
| Age, y (median [range])                                    | 40.0 (21–61)                                               | 43.0 (19–64)                                                 | 42.0 (18–59)                                   | 44.5 (22–65)                                            | 43.0 (19–65)                                                             |
| Sex                                                        |                                                            |                                                              |                                                |                                                         |                                                                          |
| Female                                                     | 13 (41.9)                                                  | 18 (58.1)                                                    | 20 (62.5)                                      | 15 (46.9)                                               | 46 (48.9)                                                                |
| Race                                                       |                                                            |                                                              |                                                |                                                         |                                                                          |
| Asian                                                      | 0                                                          | 0                                                            | 1 (3.1)                                        | 0 (0)                                                   | 0 (0)                                                                    |
| Black or African American                                  | 8 (25.8)                                                   | 3 (9.7)                                                      | 5 (15.6)                                       | 5 (15.6)                                                | 16 (17.0)                                                                |
| White                                                      | 23 (74.2)                                                  | 28 (90.3)                                                    | 26 (81.3)                                      | 27 (84.4)                                               | 78 (83.0)                                                                |
| Ethnicity                                                  |                                                            |                                                              |                                                |                                                         |                                                                          |
| Hispanic or Latino                                         | 17 (54.8)                                                  | 20 (64.5)                                                    | 16 (50.0)                                      | 17 (53.1)                                               | 54 (57.4)                                                                |
| Duration of illness at baseline                            |                                                            |                                                              |                                                |                                                         |                                                                          |
| ≤48 h                                                      | 15 (48.4)                                                  | 18 (58.1)                                                    | 14 (43.8)                                      | 18 (56.3)                                               | 51 (54.3)                                                                |
| >48 h                                                      | 16 (51.6)                                                  | 13 (41.9)                                                    | 18 (56.3)                                      | 14 (43.8)                                               | 43 (45.7)                                                                |
| Body temperature, °C (median [range])                      | 38.00 (36.1–39.6)                                          | 38.15 (35.8–39.7)                                            | 38.10 (36.5–39.3)                              | 38.00 (36.1–39.6)                                       | 38.00 (35.8–39.7)                                                        |
| Solicited influenza symptoms, total score (median [range]) | 17.0 (7–21)                                                | 16.0 (7–21)                                                  | 16.0 (6–21)                                    | 17.0 (10–21)                                            | 17.0 (7–21)                                                              |
| Confirmed influenza by viral subtype via RT-PCR            |                                                            |                                                              |                                                |                                                         |                                                                          |
| A/H1N1                                                     | 22 (71.0)                                                  | 21 (67.7)                                                    | 26 (81.3)                                      | 20 (62.5)                                               | 63 (67.0)                                                                |
| A/H3N2                                                     | 5 (16.1)                                                   | 2 (6.5)                                                      | 4 (12.5)                                       | 3 (9.4)                                                 | 10 (10.6)                                                                |

<sup>a</sup> Data are presented as *n* (%) unless otherwise noted.

OS = oseltamivir; RT-PCR = reverse transcription–polymerase chain reaction.

**Supplemental Table S2.** Subject samples containing influenza A neuraminidase amino acid changes in last sequenced sample relative to baseline

| Subject<br>gender/age<br>(y) | Subtype | Treatment group        | NA<br>amino<br>acid at<br>baseline<br>(day 1) | NA amino acid<br>change at last day<br>sequenced |              | Change in<br>known OS-<br>susceptible<br>site <sup>a</sup> |
|------------------------------|---------|------------------------|-----------------------------------------------|--------------------------------------------------|--------------|------------------------------------------------------------|
|                              |         |                        |                                               | Change                                           | Study<br>day |                                                            |
| Male/24                      | H1N1    | MEDI8852 750 mg + OS   | M15<br>F115                                   | M15V<br>F115L                                    | Day 5        | None                                                       |
| Male/24                      | H1N1    | MEDI8852 750 mg + OS   | V321                                          | V321I                                            | Day 7        | None                                                       |
| Female/56                    | H1N1    | MEDI8852 3,000 mg + OS | W33                                           | W33R                                             | Day 5        | None                                                       |
| Female/40                    | H1N1    | Placebo + OS           | D199                                          | D199N                                            | Day 5        | None                                                       |
| Female/57                    | H1N1    | Placebo + OS           | I23                                           | I23T                                             | Day 3        | None                                                       |
| Female/58                    | H1N1    | Placebo + OS           | M15<br>T350                                   | M15V<br>T350S                                    | Day 3        | None                                                       |
| Male/39                      | H1N1    | Placebo + OS           | S334                                          | S334N                                            | Day 3        | None                                                       |
| Male/45                      | H1N1    | Placebo + OS           | S299                                          | S299 <sup>b</sup>                                | Day 3        | None                                                       |
| Female/54                    | H1N1    | MEDI8852 3,000 mg      | S229                                          | S229F                                            | Day 7        | None                                                       |
| Male/22                      | H1N1    | MEDI8852 3,000 mg      | T55                                           | T55N                                             | Day 11       | None                                                       |
| Male/36                      | H3N2    | MEDI8852 3,000 mg      | T157<br>S416                                  | T157A<br>S416N                                   | Day 3        | None                                                       |
| Male/51                      | H1N1    | MEDI8852 3,000 mg      | R107                                          | R107G                                            | Day 3        | None                                                       |

<sup>a</sup>No amino acid change was observed within a known oseltamivir-resistant site (H1N1-E119, H275, R293 and N295 [N1 numbering], and H3N2-E119, H274, R292, and N294 [N2 numbering]).

<sup>b</sup>A stop codon was observed at this site.

NA = neuraminidase; OS = oseltamivir.

**Supplemental Table S3.** Baseline samples with unique influenza A hemagglutinin amino acid changes in the MEDI8852 binding site<sup>a</sup>

| <b>Subject<br/>gender/age<br/>(y)</b> | <b>Treatment group</b> | <b>Subtype</b> | <b>Baseline (day 1)</b> |
|---------------------------------------|------------------------|----------------|-------------------------|
| Female/42                             | MEDI8852 750 mg + OS   | H1N1           | L382Q                   |
| Female/54                             | MEDI8852 750 mg + OS   | H1N1           | L382Q                   |
| Male/24                               | MEDI8852 750 mg + OS   | H1N1           | L382Q                   |
| Male/40                               | MEDI8852 3,000 mg + OS | H1N1           | V47F                    |
| Male/48                               | MEDI8852 3,000 mg + OS | H1N1           | L382Q                   |
| Female/48                             | Placebo + OS           | H1N1           | V47I                    |
| Female/52                             | Placebo + OS           | H1N1           | L382Q                   |
| Female/51                             | MEDI8852 3,000 mg      | H1N1           | L382Q                   |
| Female/64                             | MEDI8852 3,000 mg      | H1N1           | L382Q                   |
| Male/40                               | MEDI8852 3,000 mg      | H1N1           | L382L/Q                 |

<sup>a</sup>MEDI8852 binding site (30 amino acids) changes are relative to a reference sequence (A/Bolivia/559/2013 [H1N1] and A/Hong Kong/4801/2014 [H3N2]).

OS = oseltamivir.

**Supplemental Table S4.** Subject samples containing influenza A hemagglutinin amino acid changes in the last sequenced sample relative to baseline

| Subject<br>gender/age<br>(y) | Subtype | Treatment group        | HA<br>amino<br>acid at<br>baseline<br>(day 1) | HA amino acid<br>change at last day<br>sequenced |              | Change within<br>MEDI8852<br>binding<br>region <sup>a</sup> |
|------------------------------|---------|------------------------|-----------------------------------------------|--------------------------------------------------|--------------|-------------------------------------------------------------|
|                              |         |                        |                                               | Change                                           | Study<br>day |                                                             |
| Male/36                      | H1N1    | MEDI8852 750 mg + OS   | T500                                          | T500I                                            | Day 3        | None                                                        |
| Male/43                      | H1N1    | MEDI8852 3,000 mg + OS | S102                                          | S102L                                            | Day 3        | None                                                        |
| Male/21                      | H1N1    | Placebo + OS           | N245                                          | N245D                                            | Day 3        | None                                                        |
| Male/39                      | H1N1    | Placebo + OS           | H486                                          | H486Y                                            | Day 3        | None                                                        |
| Male/45                      | H1N1    | Placebo + OS           | P199                                          | P199Q                                            | Day 3        | None                                                        |
| Female/54                    | H1N1    | MEDI8852 3,000 mg      | R276                                          | R276K                                            | Day 5        | None                                                        |

<sup>a</sup>No amino acid change was observed within the putative MEDI8852 binding regions. MEDI8852 binding regions consist of 30 amino acids identified by crystallographic structure analysis and in vitro analyses of monoclonal antibody-resistant mutants.

HA = hemagglutinin; OS = oseltamivir.



**Supplemental Table S5.** Time to resolution and duration and severity of illness, influenza A–infected subjects confirmed by RT-PCR (intent-to-treat population)

| <b>Parameter<sup>a</sup></b>       | <b>Cohort 1:<br/>750 mg<br/>MEDI8852 + OS<br/>(n = 27)</b> | <b>Cohort 2:<br/>3,000 mg<br/>MEDI8852 + OS<br/>(n = 23)</b> | <b>Cohort 3:<br/>placebo + OS<br/>(n = 31)</b> | <b>Cohort 4:<br/>3,000 mg<br/>MEDI8852<br/>(n = 25)</b> | <b>Cohorts 1, 2, and<br/>4 combined:<br/>total MEDI8852<br/>(n = 75)</b> |
|------------------------------------|------------------------------------------------------------|--------------------------------------------------------------|------------------------------------------------|---------------------------------------------------------|--------------------------------------------------------------------------|
| <b>Cough</b>                       |                                                            |                                                              |                                                |                                                         |                                                                          |
| Time to resolution (h)             | 71.58<br>(26.50–107.25)                                    | 92.37<br>(44.25–96.50)                                       | 81.77<br>(43.58–132.00)                        | 92.00<br>(46.38–151.58)                                 | 87.60<br>(59.40–103.22)                                                  |
| Duration and severity<br>(score-h) | 284.30<br>(0–525.00)                                       | 304.30<br>(51.20–648.00)                                     | 287.80<br>(0–667.50)                           | 281.80<br>(24.50–620.40)                                | 289.50<br>(0–648.00)                                                     |
| <b>Nasal obstruction</b>           |                                                            |                                                              |                                                |                                                         |                                                                          |
| Time to resolution (h)             | 48.17<br>(22.23–67.07)                                     | 29.25<br>(12.67–55.97)                                       | 52.45<br>(22.83–62.75)                         | 59.40<br>(21.67–94.40)                                  | 48.10<br>(27.67–59.17)                                                   |
| Duration and severity<br>(score-h) | 179.50<br>(12.00–434.80)                                   | 190.60<br>(16.50–577.50)                                     | 203.20<br>(0–451.60)                           | 228.80<br>(0–432.70)                                    | 202.30<br>(0–577.50)                                                     |
| <b>Sore throat</b>                 |                                                            |                                                              |                                                |                                                         |                                                                          |
| Time to resolution (h)             | 10.42<br>(7.73–27.67)                                      | 45.17<br>(17.25–55.97)                                       | 31.00<br>(10.77–56.97)                         | 22.45<br>(9.75–57.50)                                   | 23.08<br>(10.58–44.17)                                                   |
| Duration and severity<br>(score-h) | 87.60<br>(0–550.80)                                        | 154.00<br>(0–534.00)                                         | 136.60<br>(0–379.70)                           | 107.80<br>(0–515.80)                                    | 119.10<br>(0–550.80)                                                     |
| <b>Fatigue</b>                     |                                                            |                                                              |                                                |                                                         |                                                                          |
| Time to resolution (h)             | 24.42<br>(12.00–66.33)                                     | 55.28<br>(32.47–69.45)                                       | 50.30<br>(32.50–80.83)                         | 46.82<br>(34.08–67.17)                                  | 46.23<br>(32.47–56.78)                                                   |
| Duration and severity<br>(score-h) | 150.40<br>(12.10–476.80)                                   | 154.50<br>(46.90–534.00)                                     | 137.00<br>(16.90–661.20)                       | 162.50<br>(58.50–490.70)                                | 154.50<br>(12.10–534.00)                                                 |
| <b>Headache</b>                    |                                                            |                                                              |                                                |                                                         |                                                                          |
| Time to resolution (h)             | 24.17<br>(10.42–30.33)                                     | 31.28<br>(20.05–32.67)                                       | 42.33<br>(20.50–45.77)                         | 21.25<br>(10.67–28.17)                                  | 23.40<br>(20.05–28.17)                                                   |

| <b>Parameter<sup>a</sup></b>       | <b>Cohort 1:<br/>750 mg<br/>MEDI8852 + OS<br/>(n = 27)</b> | <b>Cohort 2:<br/>3,000 mg<br/>MEDI8852 + OS<br/>(n = 23)</b> | <b>Cohort 3:<br/>placebo + OS<br/>(n = 31)</b> | <b>Cohort 4:<br/>3,000 mg<br/>MEDI8852<br/>(n = 25)</b> | <b>Cohorts 1, 2, and<br/>4 combined:<br/>total MEDI8852<br/>(n = 75)</b> |
|------------------------------------|------------------------------------------------------------|--------------------------------------------------------------|------------------------------------------------|---------------------------------------------------------|--------------------------------------------------------------------------|
| Duration and severity<br>(score-h) | 65.30<br>(0–334.80)                                        | 118.90<br>(6.00–391.50)                                      | 112.80<br>(0–505.20)                           | 58.10<br>(0–419.50)                                     | 81.50<br>(0–419.50)                                                      |
| <b>Myalgia</b>                     |                                                            |                                                              |                                                |                                                         |                                                                          |
| Time to resolution (h)             | 24.17<br>(10.42–43.67)                                     | 56.40<br>(20.67–77.25)                                       | 44.08<br>(31.75–58.08)                         | 33.25<br>(23.40–51.25)                                  | 32.25<br>(23.40–45.25)                                                   |
| Duration and severity<br>(score-h) | 106.40<br>(10.60–311.50)                                   | 131.70<br>(17.80–417.00)                                     | 156.40<br>(29.60–553.00)                       | 124.20<br>(46.80–516.70)                                | 115.80<br>(10.60–516.70)                                                 |
| <b>Feverishness</b>                |                                                            |                                                              |                                                |                                                         |                                                                          |
| Time to resolution (h)             | 22.45<br>(8.08–33.02)                                      | 29.55<br>(18.50–40.17)                                       | 43.58<br>(32.00–50.62)                         | 21.67<br>(18.23–33.00)                                  | 22.75<br>(18.50–29.55)                                                   |
| Duration and severity<br>(score-h) | 56.20<br>(3.80–323.40)                                     | 74.90<br>(18.00–378.00)                                      | 97.80<br>(10.60–305.10)                        | 53.80<br>(1.90–365.50)                                  | 66.80<br>(1.90–378.00)                                                   |

<sup>a</sup>Data on time to resolution are presented as median (95% confidence interval); duration and severity data are presented as median (range). Confidence intervals were calculated based on the median obtained from Kaplan-Meier analysis. Score-hours were assessed by area-under-the-curve analysis derived on a by-subject basis, using the linear trapezoidal rule with all available data from baseline to the last time point with influenza symptoms measurement up to day 13.

OS = oseltamivir; RT-PCR = reverse transcriptase-polymerase chain reaction.

**Supplemental Table S6.** Time to resolution of illness in subjects with baseline severity score greater than the median score at baseline, influenza A–infected subjects confirmed by RT-PCR (intent-to-treat population)

| Cohort                                                     | Time to resolution (median [95% CI]) <sup>a</sup> |                         |                        |                         |                        |                         |                        |
|------------------------------------------------------------|---------------------------------------------------|-------------------------|------------------------|-------------------------|------------------------|-------------------------|------------------------|
|                                                            | Cough                                             | Nasal obstruction       | Sore throat            | Fatigue                 | Headache               | Myalgia                 | Feverishness           |
| Cohort 1:<br>750 mg MEDI8852 + OS<br>(n = 12)              | 104.25<br>(14.10–159.42)                          | 68.42<br>(27.67–101.62) | 41.42<br>(7.33–114.05) | 66.19<br>(24.42–94.50)  | 29.00<br>(17.17–42.45) | 49.42<br>(23.08–101.62) | 36.28<br>(6.17–57.12)  |
| Cohort 2:<br>3,000 mg MEDI8852 + OS<br>(n = 11)            | 80.83<br>(45.25–96.50)                            | 44.25<br>(11.80–119.75) | 48.08<br>(32.67–56.40) | 53.17<br>(17.75–69.45)  | 31.50<br>(11.80–43.98) | 31.97<br>(8.17–69.45)   | 32.17<br>(11.80–55.97) |
| Cohort 3:<br>placebo + OS<br>(n = 11)                      | 161.75<br>(22.00–255.82)                          | 88.33<br>(10.00–171.62) | 60.13<br>(10.00–76.75) | 63.07<br>(22.00–101.99) | 51.07<br>(20.50–88.75) | 53.50<br>(22.00–99.07)  | 51.07<br>(22.00–77.33) |
| Cohort 4:<br>3,000 mg MEDI8852<br>(n = 14)                 | 75.70<br>(43.92–148.50)                           | 66.54<br>(28.17–114.73) | 38.46<br>(10.25–67.62) | 45.37<br>(28.17–88.58)  | 22.26<br>(8.08–45.25)  | 38.58<br>(18.83–92.95)  | 30.58<br>(18.50–53.00) |
| Cohorts 1, 2 and 4 combined:<br>total MEDI8852<br>(n = 37) | 92.00<br>(62.25–118.17)                           | 59.58<br>(45.12–90.33)  | 45.90<br>(28.17–57.50) | 55.17<br>(33.12–66.33)  | 28.17<br>(23.08–32.17) | 43.67<br>(27.67–59.17)  | 32.17<br>(23.40–43.98) |

<sup>a</sup>The median time to resolution of influenza symptoms were summarized by Kaplan-Meier curves. Subjects with missing data were censored. Confidence intervals were calculated based on the median obtained from the Kaplan-Meier analysis.

CI = confidence interval; OS = oseltamivir; RT-PCR = reverse transcriptase-polymerase chain reaction.
